# Supplementary material for: LIMK1/2 inhibitor LIMKi 3 suppresses porcine oocyte maturation
Source: PeerJ. 2016 Oct 12;4:e2553. doi: 10.7717/peerj.2553 (PMC5068415; doi:10.7717/peerj.2553)
Supplement: Data S1 [file peerj-04-2553-s001.xlsx]

## Sheet: Sheet1
the rate of polar body extrusion
	control	100μM	200μM
1	79.6	59.8	41.2
2	73.3	48.6	53.1
3	76.8	58.1	46
4	66.1	60.6	43.2
5	71.4	63.1	50.9
average	73.44	58.04	46.88
STDEV	5.17909	5.57611	5.03557

## Sheet: Sheet2
actin intensity in membrane
	control-actin-cortex	treatment
1	94.12	54.06
2	58.14	32.72
3	68.01	47.01
4	77.59	52.65
5	96.52	54.46
A	78.876	48.18
STDEV	16.5333	9.14295
T-TEST	0.00205743

## Sheet: Sheet3
actin intensity in cytoplasm
	control-cytoplasm	treatment
1	20.1958	14.5925
2	24.3062	17.4348
3	35.0134	29.0417
4	39.5204	29.7452
A	29.759	22.7036
STDEV	9.02002	7.81678
TTEXT	0.00497405
	yes

## Sheet: Sheet4
	spindle positioning
	C-GVBD	T-GVBD	C-MI-center	T-MI-center	C-MI-cortex	T-MI-cortex	C-ATI	T-ATI
1	0	0	23.73	60.47	72.88	39.53	3.39	0
2	7.32	8	26.83	64	43.9	24	21.95	4
3	3.7	3.03	25.93	48.48	62.96	48.48	7.41	0
4	6.45	8.69	35.48	60.87	48.39	30.43	9.68	0
5	8.93	8.7	23.21	43.48	58.93	36.96	8.93	10.87
6	2.5	0	20	62.5	72.5	37.5	5	0
7	3.64	2	30.91	60	54.54	30	10.91	8
average	4.64857	4.34571	26.5843	57.1143	59.1571	35.2714	9.61	3.26714
STDEV	3.07828	4.00396	5.18362	7.85872	11.187	7.94452	6.04447	4.53573
T-TEST	0.622073		7.23839e-05		0.000177781		0.0372737
